# Supplementary material
Source: PubMed Central journal article supplement (PMC9391304)
Supplement: NIHMS1821335-supplement-1.pdf [file NIHMS1821335-supplement-1.pdf]

# 1 Supplementary Figure Legends

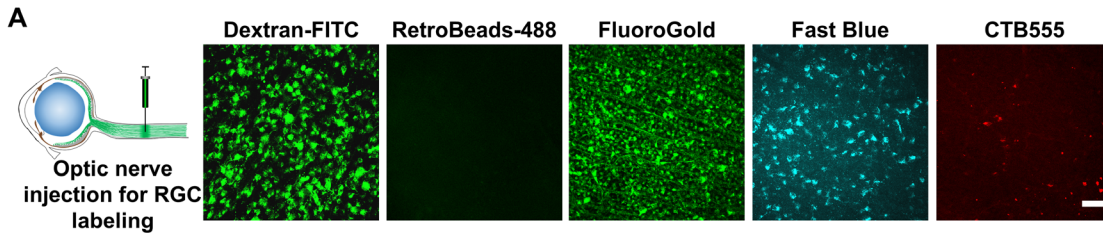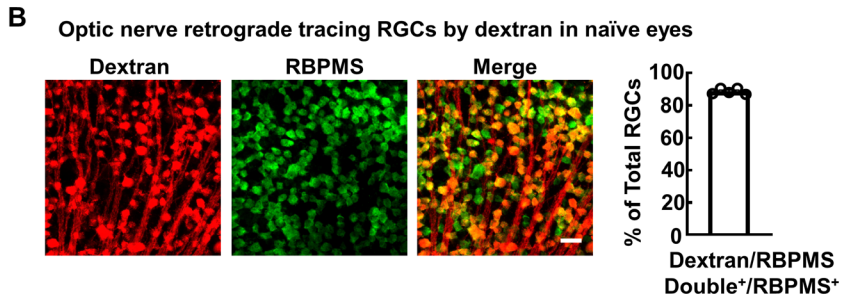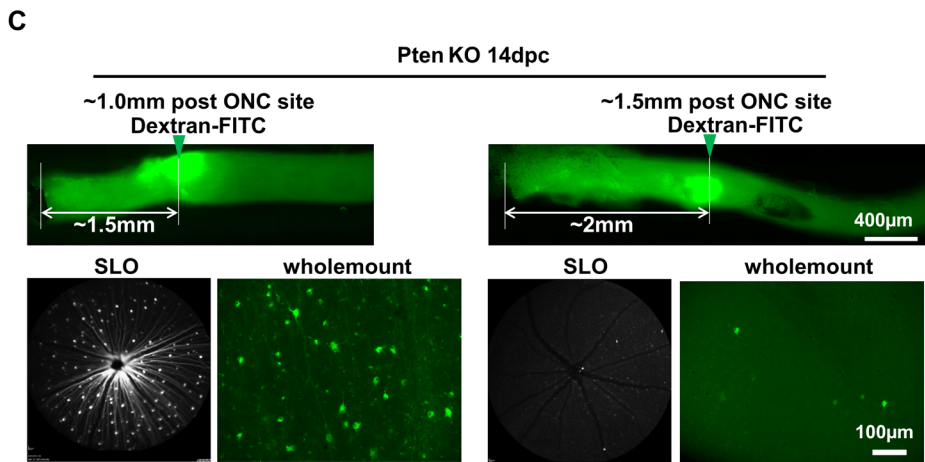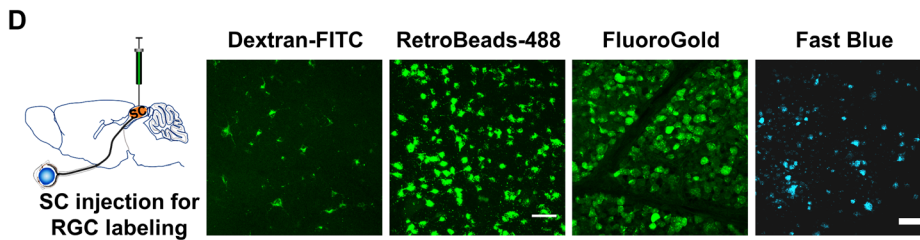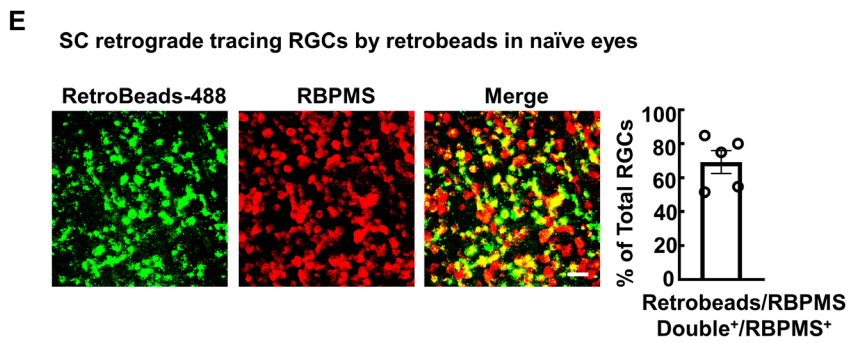

2 **Figure S1. Testing retrograde tracing dyes for RGC labeling, Related to Figure 1. (A)** Intraorbital  
3 optic nerve injection of retrograde tracer dyes in naïve mouse; and retinal wholemounts showing the  
4 labeled RGCs. **(B)** Quantification of RGC labeling efficiency by optic nerve retrograde tracing with  
5 dextran. Data are presented as means  $\pm$  s.e.m. **(C)** Optic nerve wholemounts showing injection site of  
6 dextran at 1 or 1.5mm distal to crush site in Pten KO mice; the SLO retinal fundus images and retinal  
7 wholemounts showing labeled regenerating RGCs. **(D)** SC injection of retrograde tracer dyes in naïve  
8 mouse; and retinal wholemounts showing RGCs labeled with retrograde dyes 4 weeks after SC  
9 injection. **(E)** Quantification of RGC labeling efficiency by SC retrograde tracing with retrobeads.  
10 Data are presented as means  $\pm$  s.e.m.

11

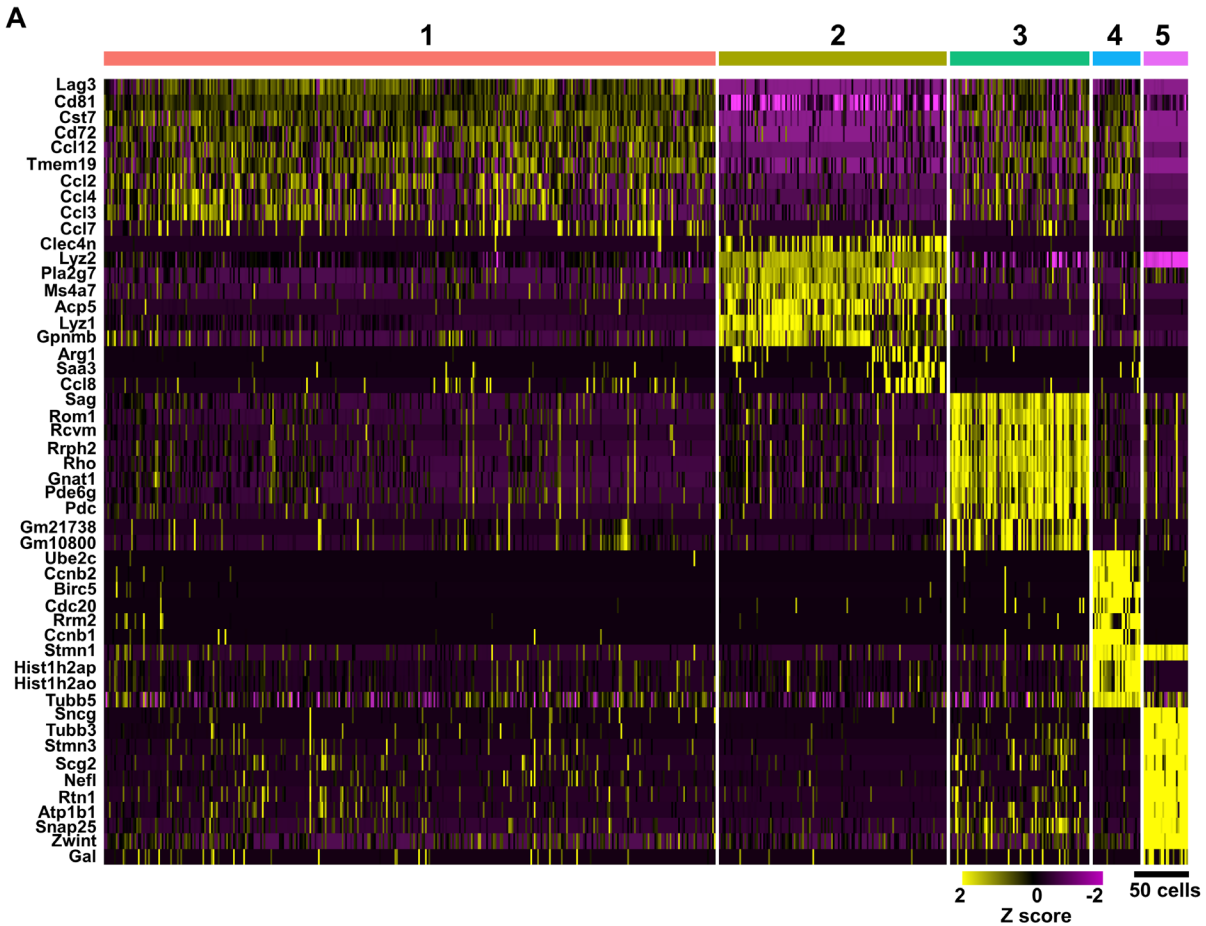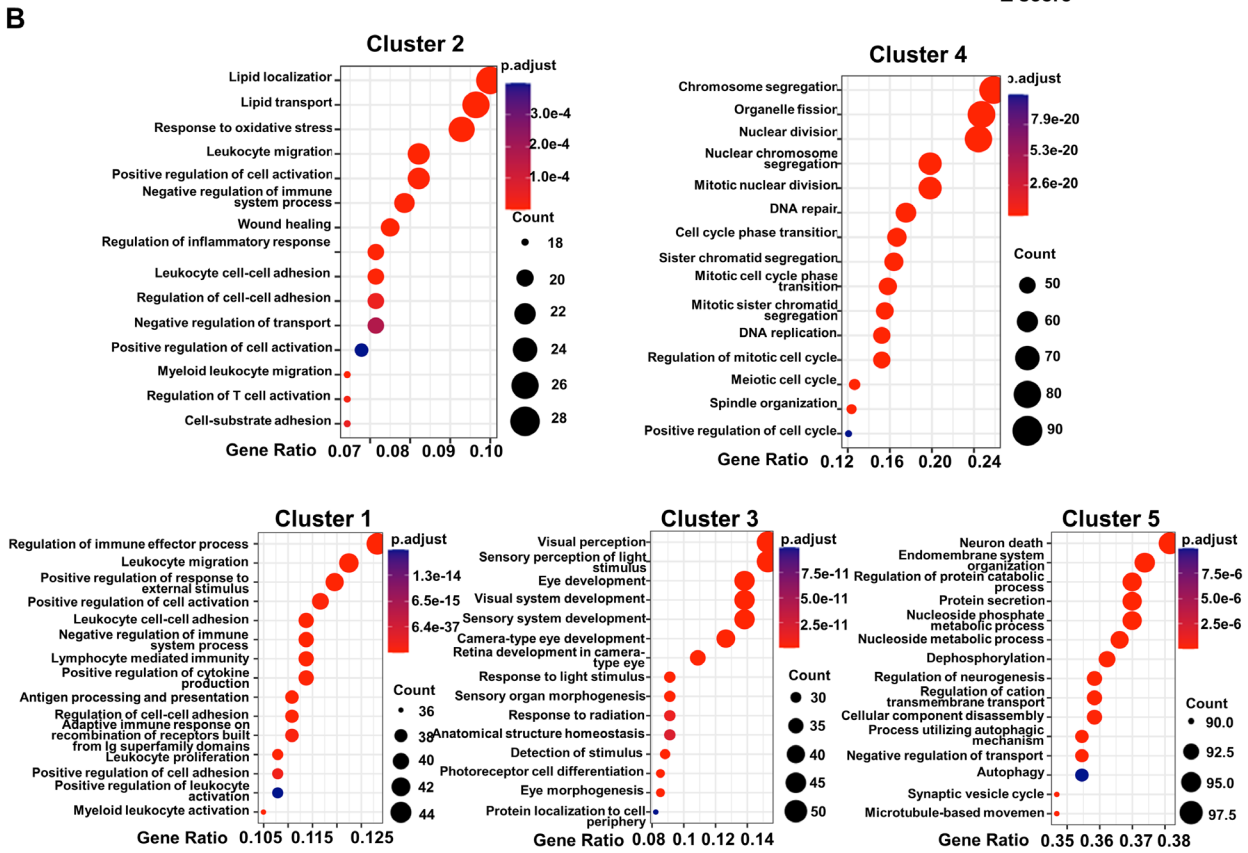

13 **Figure S2. DEGs and GO biological pathways enriched in each cluster, Related to Figure 2. (A)**  
14 Heatmap showing top 10 genes selectively expressed in each cluster in all the RGCs. **(B)** Top 15  
15 enriched GO-pathways analyzed with DEGs of each cluster. The size of each circle represents the  
16 numbers of genes enriched in each pathway, and the color represents the adjusted  $p$  value.

17

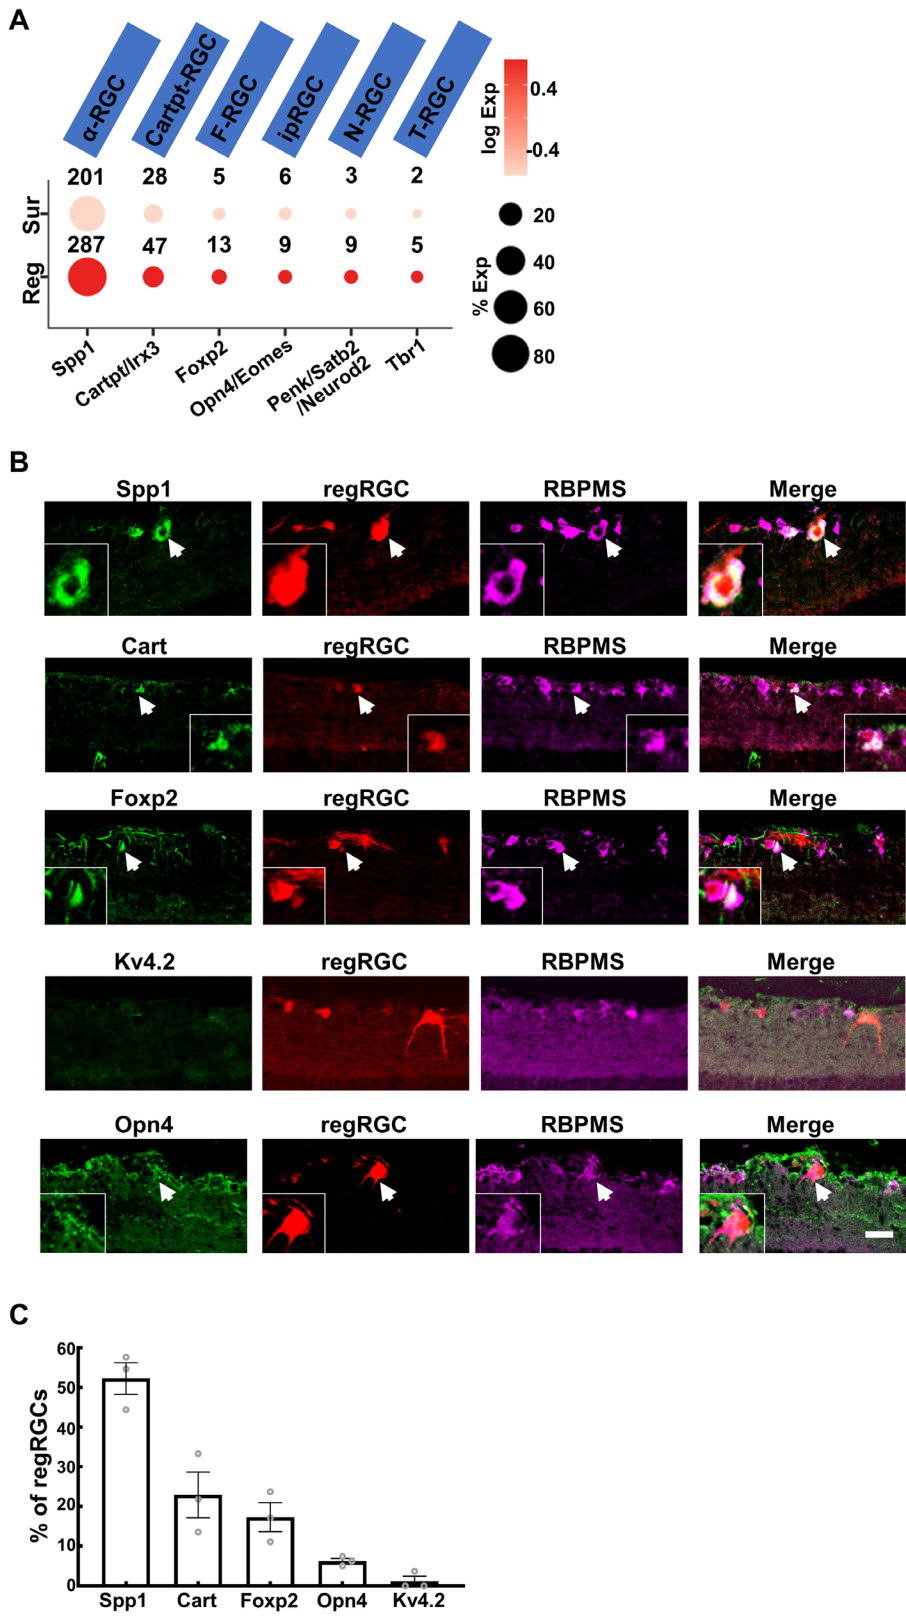

18

19

20 **Figure S3. RGC subtype-marker genes detected in regRGCs, Related to Figure 2. (A)** Dotplot

21 showing expression of RGC subtype-marker genes defined in a previous study (Tran, et al, 2019). The

22 size of each circle represents the percentage of RGCs expressing the gene, and the color represents the  
23 expression level. **(B)** Immunostaining of RGC subtype-marker genes (Spp1:  $\alpha$ RGC, Cart: Carpt-RGC,  
24 Foxp2: F-RGC, Opn4: ipRGC and Kv4.2: W3-RGC) in regRGCs. White arrows show the co-  
25 localization of subtype-marker genes with dextran labeled RBPMS+ regRGCs. Scale bar, 50 $\mu$ m. **(C)**  
26 Quantification of regRGCs with RGC subtype markers detected by immunostaining. Data are  
27 presented as means  $\pm$  s.e.m. n = 3 of each group.

28

29

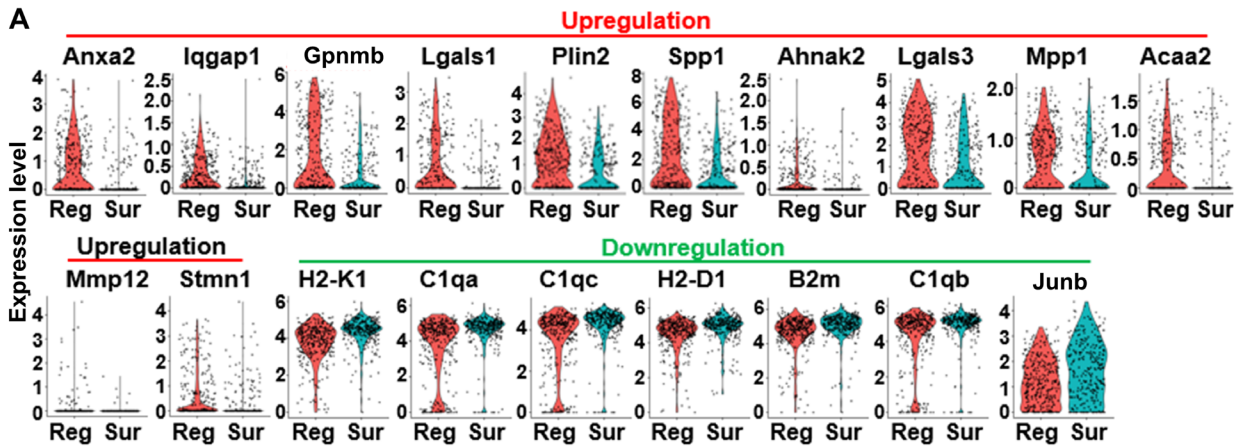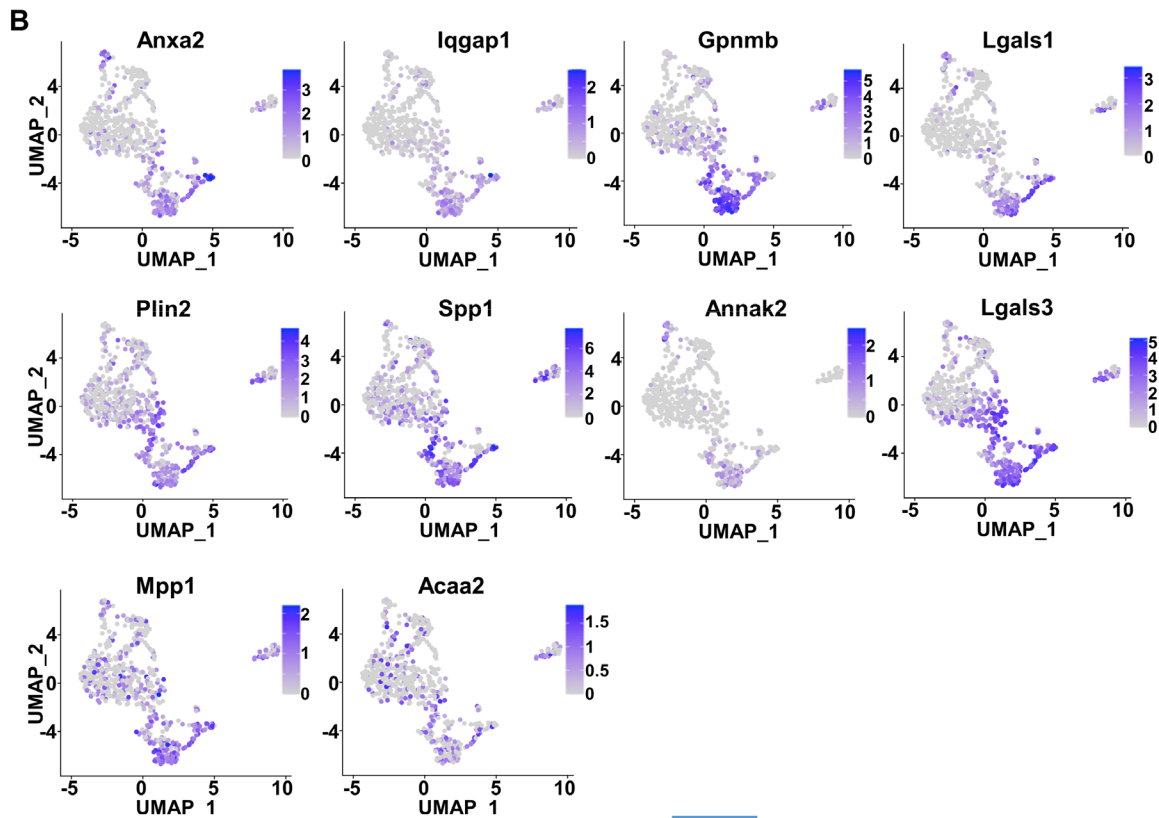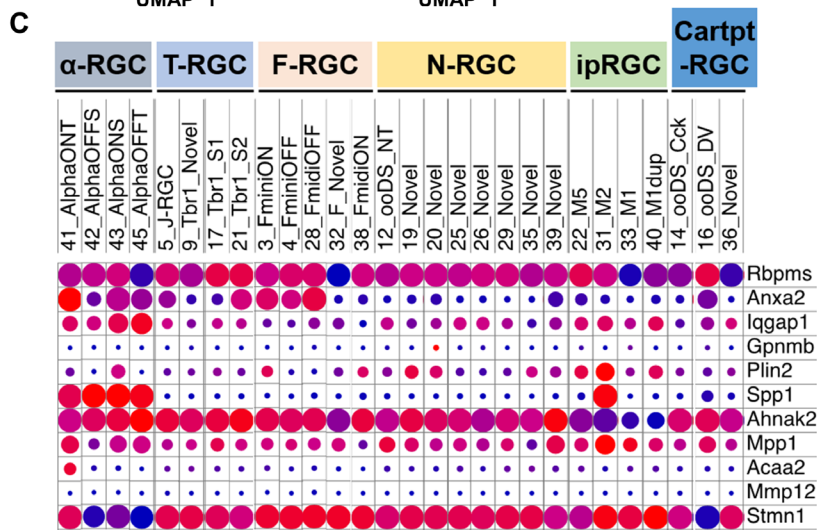

31 **Figure S4. The expression of selective regeneration-associated DEGs, Related to Figure 3. (A)**  
32 Violin plots of the expression of selective regeneration-associated DEGs in regRGCs and surRGCs.  
33 **(B)** UMAP visualization of the selectively upregulated regeneration-associated DEGs in different  
34 clusters of RGCs. **(C)** The expression of selective regeneration-associated DEGs in  $\alpha$ -RGC and another  
35 5 RGC subtypes of naïve adult mouse according to online database.

36 [https://singlecell.broadinstitute.org/single\\_cell/study/SCP509/mouse-retinal-ganglion-cell-adult-](https://singlecell.broadinstitute.org/single_cell/study/SCP509/mouse-retinal-ganglion-cell-adult-atlas-and-optic-nerve-crush-time-series?cluster=Ctrl_RGCs_ONC_Dataset&spatialGroups=-&annotation=Cluster--group--cluster&subsample=all#study-visualize)  
37 [atlas-and-optic-nerve-crush-time-series?cluster=Ctrl\\_RGCs\\_ONC\\_Dataset&spatialGroups=-](https://singlecell.broadinstitute.org/single_cell/study/SCP509/mouse-retinal-ganglion-cell-adult-atlas-and-optic-nerve-crush-time-series?cluster=Ctrl_RGCs_ONC_Dataset&spatialGroups=-&annotation=Cluster--group--cluster&subsample=all#study-visualize)  
38 [&annotation=Cluster--group--cluster&subsample=all#study-visualize](https://singlecell.broadinstitute.org/single_cell/study/SCP509/mouse-retinal-ganglion-cell-adult-atlas-and-optic-nerve-crush-time-series?cluster=Ctrl_RGCs_ONC_Dataset&spatialGroups=-&annotation=Cluster--group--cluster&subsample=all#study-visualize)

39

40



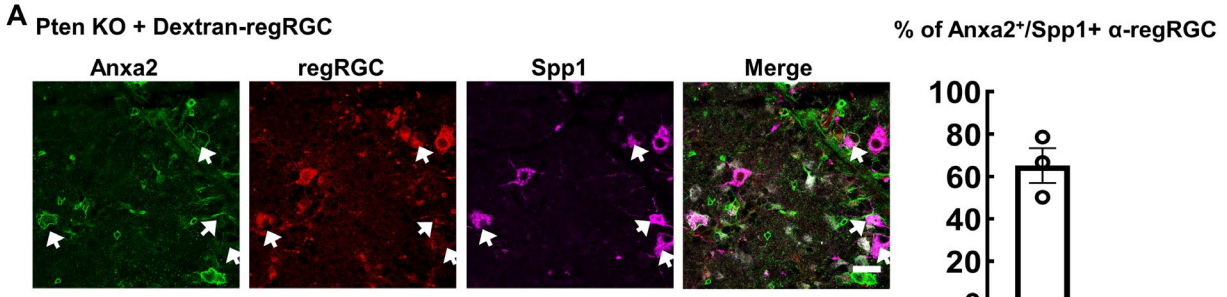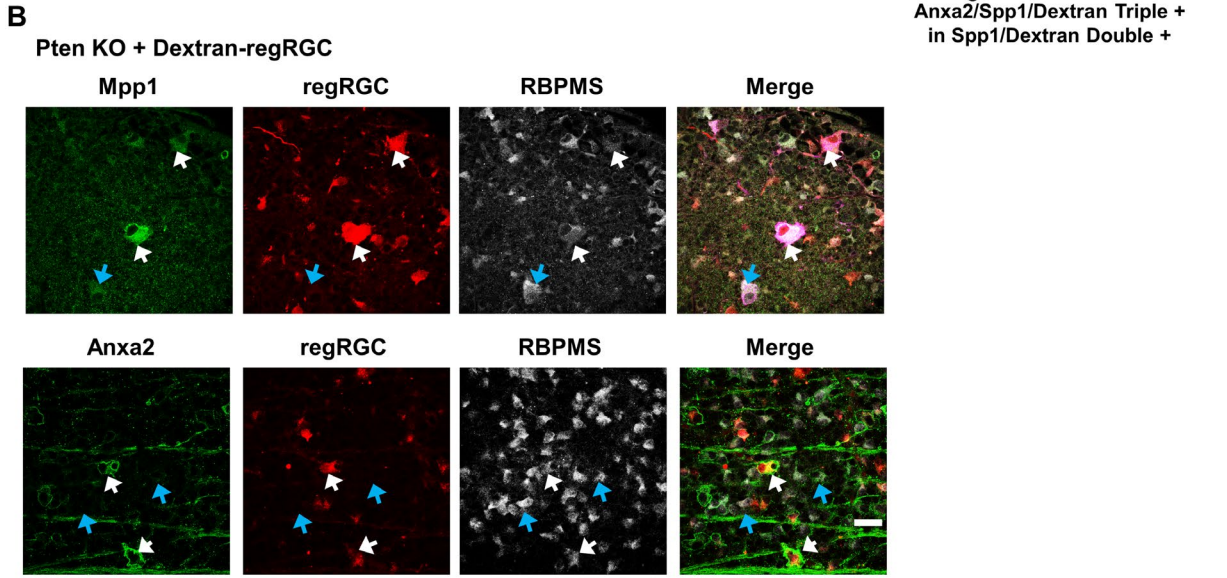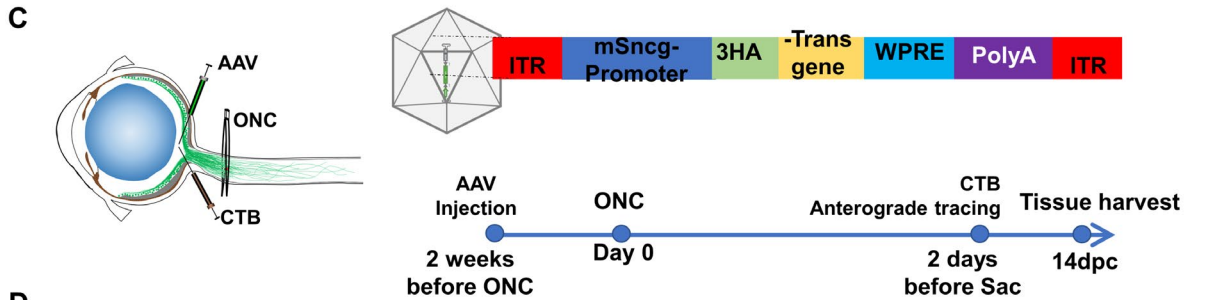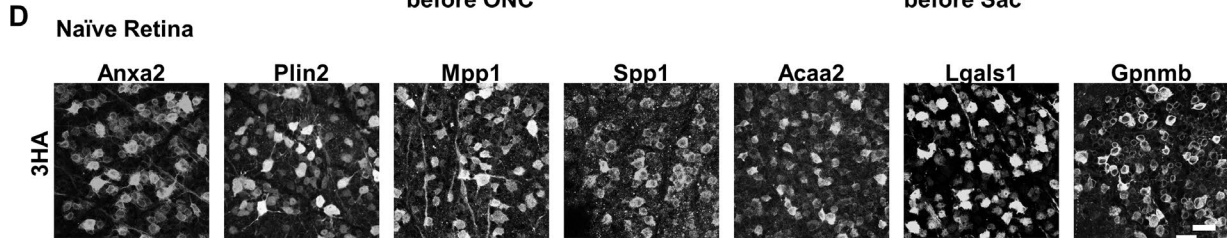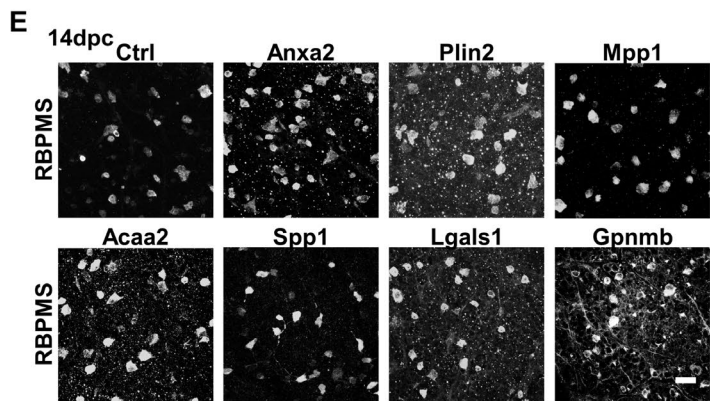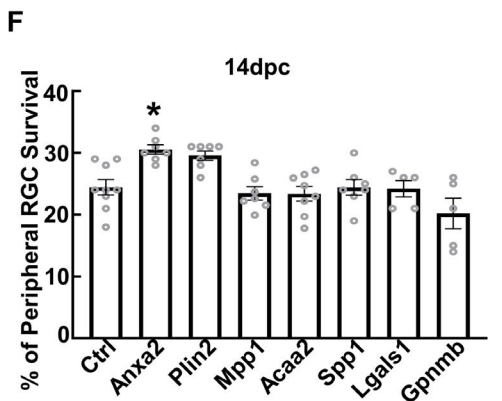

42 **Figure S5. Validation of expression of some regeneration-associated genes' in regRGCs, and the**  
43 **AAV-mediated their expressions, Related to Figure 3 and Figure 4. (A)** Quantification of Anxa2  
44 expression in Spp1+  $\alpha$ -regRGCs. White arrows showing the co-labeling of Anxa2, Spp1 ( $\alpha$ -RGC  
45 marker), and dextran (regRGCs). Data are presented as means  $\pm$  s.e.m. Scale bar, 50 $\mu$ m. **(B)** White  
46 arrows show co-labeling of Mpp1 or Anxa2 with dextran+/RBPMS+ regRGCs. Blue arrows show co-  
47 labeling of Mpp1 or Anxa2 with dextran negative/RBPMS+ surRGCs. Scale bar, 50 $\mu$ m. **(C)** Timeline  
48 of AAV intravitreal injection, ONC, CTB anterograde tracing and animal sacrificing and tissue  
49 collection. The AAV vector containing mSncg promoter and HA-tagged transgenes. **(D)** AAV-  
50 mediated transgene expression in RGCs labeled by HA antibodies 2 weeks after intravitreal injection.  
51 Scale bar, 50  $\mu$ m. **(E)** Confocal images of retinal wholemounts showing RBPMS+ RGCs at 14dpc.  
52 Scale bar, 50  $\mu$ m. **(F)** Quantification of surviving RGC somata in peripheral retina at 14dpc,  
53 represented as percentage of crushed eyes compared to the sham CL eyes. Data are presented as means  
54  $\pm$  s.e.m, n = 5-7 in each group. \*: p<0.05, one-way ANOVA with Tukey's multiple comparisons test.  
55

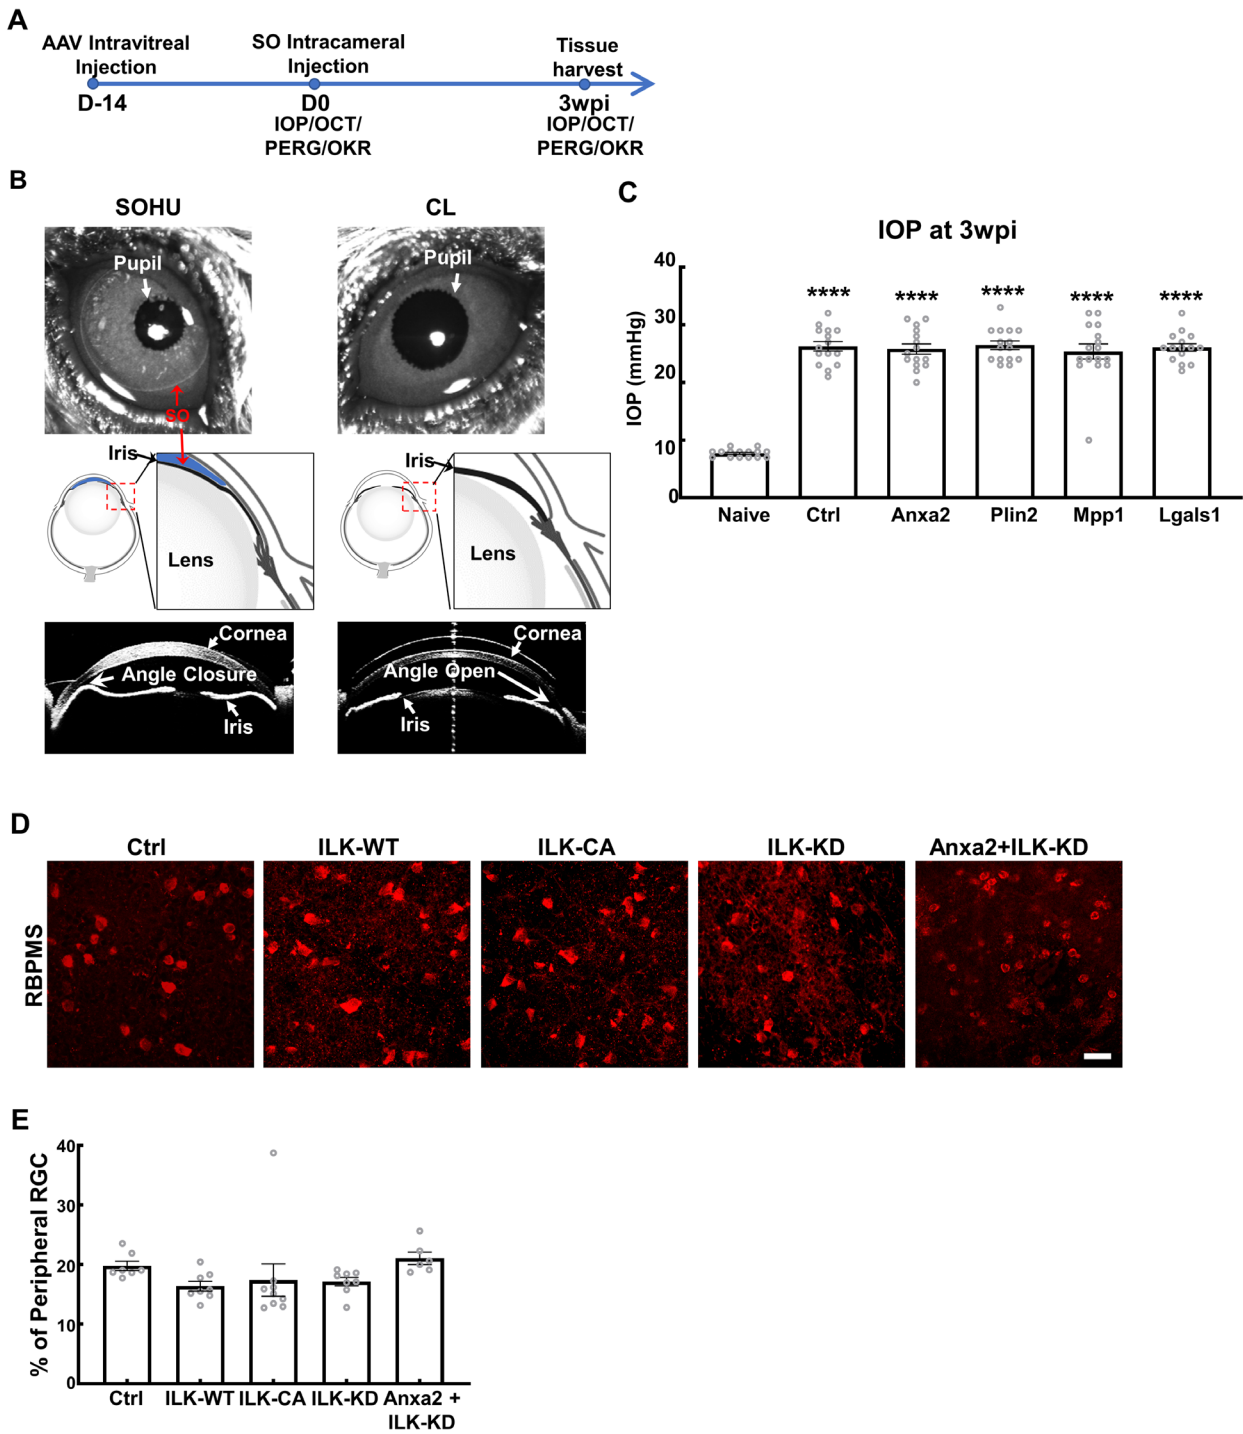

56

57

58 **Figure S6. The SOHU glaucoma model and ILK in RGC survival after ONC, Related to Figure**

59 **5 and Figure 7. (A)** The timeline of AAV intravitreal injection and SO intracameral injection to

60 generate the SOHU glaucoma model. **(B)** Photos of mouse eyeballs with or without SO intracameral

61 injection and correlated cartoon illustration and anterior segment OCT live images. **(C)** IOP of naïve

62 and SOHU eyes at 3wpi. Data are presented as means  $\pm$  s.e.m, n = 13-16 in each group. \*\*\*\*:  
63  $p < 0.0001$ , one-way ANOVA with Tukey's multiple comparisons test. **(D)** Confocal images of retinal  
64 wholemounds showing RBPMS+ RGCs at 14dpc. Scale bar, 50  $\mu$ m. **(E)** Quantification of surviving  
65 RGC somata in peripheral retina at 14dpc, represented as percentage of crushed eyes compared to the  
66 sham CL eyes. Data are presented as means  $\pm$  s.e.m, n = 5-9.

67

A

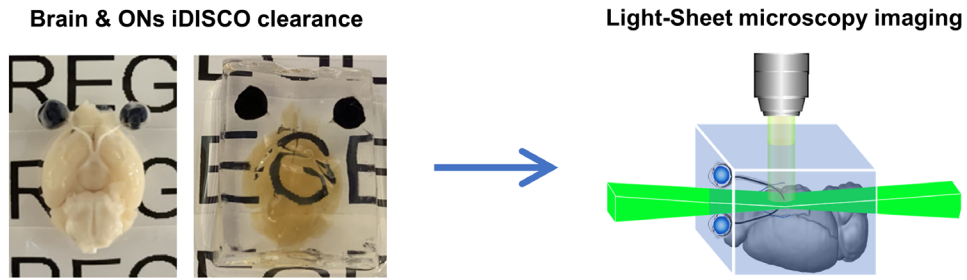

B

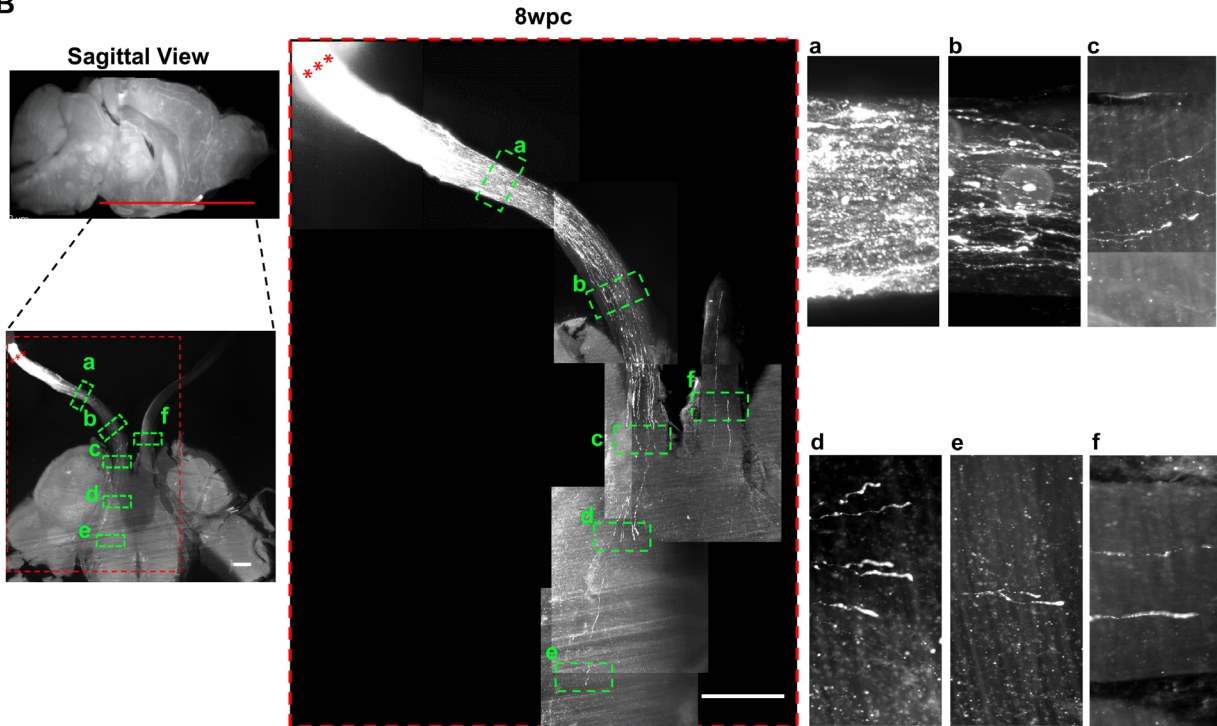

C

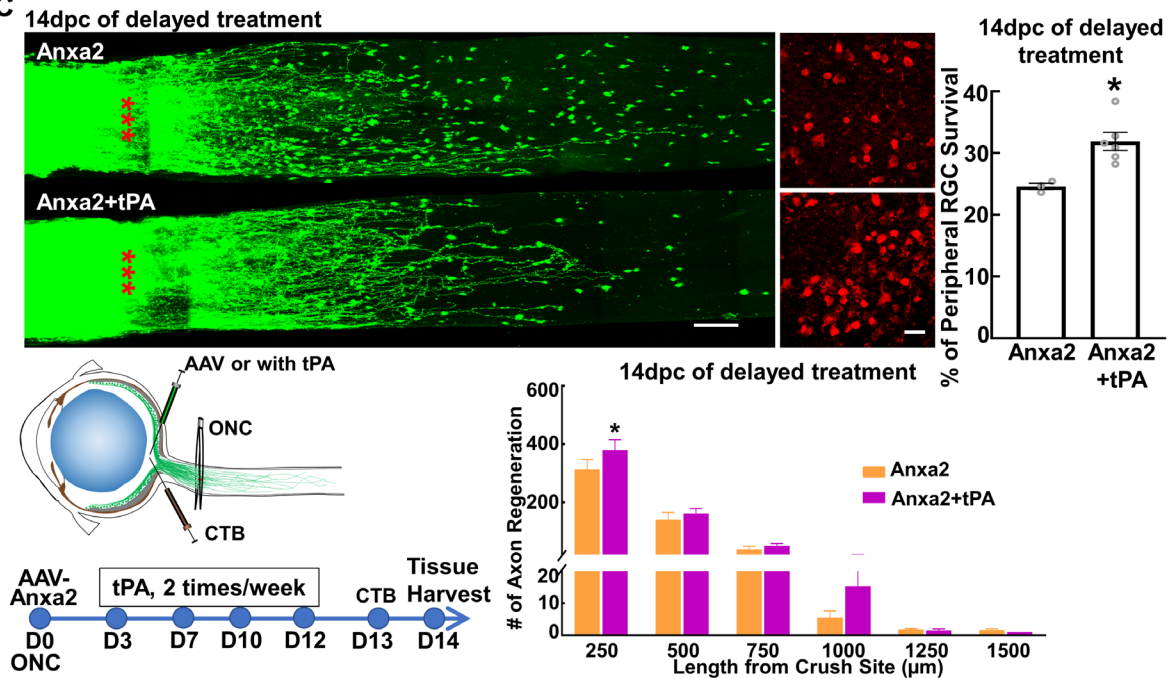

69 **Figure S7. tPA potentiated Anxa2 effect in axon regeneration and RGC survival after ONC,**  
70 **Related to Figure 6. (A)** iDISCO clearance of whole brain with attached optic nerves. **(B)** Light-sheet  
71 fluorescent images of lengthy regenerating axons in optic nerve, optic chiasm, and optic tract in Pten  
72 KO mice treated with tPA+Anxa2 at 8wpc. Scale bar, 500 $\mu$ m. **(C)** Confocal images of optic nerve  
73 wholemounts after optical clearance showing maximum intensity projection of regenerating fibers  
74 labeled with CTB-Alexa 555 at 14dpc. Scale bar, 100  $\mu$ m. \*: crush site. And representative confocal  
75 images of the whole flat-mounted retinas showing surviving RBPMS-positive (red) RGCs at 14dpc,  
76 Scale bar, 50  $\mu$ m. The timeline of delayed treatment: AAV-Anxa2 was injected the same day of ONC  
77 and tPA was injected twice a week thereafter. Data are presented as means  $\pm$  s.e.m, n = 6. \*: p<0.05,  
78 Student t-test.

79
